# Neural networks implicated in autobiographical memory training

Dragoș Cîrneți<sup>1,2</sup>, Mihaela Onu<sup>1,3</sup>, Claudiu C. Papasteri<sup>1,4</sup>, Dana Georgescu<sup>5</sup>, Catalina Poalelungi<sup>1</sup>, Alexandra Sofonea<sup>1</sup>, Nicoleta Pușcașu<sup>1</sup>, Dumitru Tanase<sup>1</sup>, Teofila Rădeanu<sup>2</sup>, Maria-Yaelle Toader<sup>2</sup>, Andreea L. Dogaru<sup>2</sup>, Ioana R. Podină<sup>1,4</sup>, Alexandru I. Berceanu<sup>1</sup> and Ioana Carcea <sup>\*,1,6</sup>

1. CINETic Center, University of Theatre and Film “I.L. Caragiale” Bucharest, Bucharest, Romania
2. Department of Psychology and Educational Sciences, Spiru Haret University, Bucharest, Romania
3. Medical Imaging Department, Clinical Hospital “Prof. dr. Th. Burghele”, Bucharest, Romania
4. Department of Psychology, University of Bucharest, Bucharest, Romania
5. Provita Medical Center
6. Department of Pharmacology, Physiology and Neuroscience, Rutgers Brain Health Institute, Rutgers, The State University of New Jersey

\*Corresponding author: [ioana.carcea@rutgers.edu](mailto:ioana.carcea@rutgers.edu)

Keywords: autobiographical memory, memory training, neural networks

36

37 **Abstract**

38 Training of autobiographical memory has been proposed as intervention to improve cognitive  
39 functions. The neural substrates for such improvements are poorly understood. Several brain  
40 networks have been previously linked to autobiographical recollections, including the default  
41 mode network (DMN) and the sensorimotor network. Here we tested the hypothesis that different  
42 neural networks support distinct aspects of memory improvement in response to training on a  
43 group of 59 subjects. We found that memory training increases DMN connectivity, and this  
44 associates with improved recollection of cue-specific memories. On the contrary, training  
45 decreased connectivity in the sensorimotor network, a decrease that correlated with improved  
46 ability for voluntary recall. Moreover, only decreased sensorimotor connectivity associated with  
47 training-induced decrease in the  $TNF\alpha$  immunological factor, which has been previously linked to  
48 improved cognitive performance. We identified functional and biochemical factors that associate  
49 with distinct memory processes improved by autobiographical training. Pathways which connect  
50 autobiographical memory to both high level cognition and somatic physiology are discussed.

51

52

53

54

55

56

57

58

59

60

61

62

63

64

65

66

67

68

69

70

## 71 **Introduction**

72 Autobiographical memories represent the fabric of our identity. In several neurodegenerative  
73 disorders that manifest with memory loss, self-identity dissipates, inducing anxiety, confusion and  
74 impaired social interactions. Training autobiographical recall might be a beneficial behavioral  
75 intervention that preserves most defining memories. Several studies have investigated the effects  
76 of autobiographical memory training on emotional well-being (Kohler, et al., 2015; Hitchcock, et  
77 al., 2016; Serrano, et al., 2004; Ricarte, et al., 2012). However, unlike studies on training of  
78 working memory or of spatial memory (de Marco et al., 2016; Brinke et al., 2017), very little is  
79 known about how autobiographical training changes the ability to recall autobiographical events,  
80 and what neurophysiological substrates might be engaged by training.

81 Previous imagistic studies have shown that brain regions activated during  
82 autobiographical recall form a network that largely overlaps with the default mode network (DMN),  
83 comprised of medial prefrontal cortex, medial parietal cortex, lateral and medial temporal lobe,  
84 precuneus, posterior cingulate cortex, retrosplenial cortex and temporo-parietal junction  
85 (Buchanan, 2007; Spreng et al., 2009). The structures are also activated by imagining future  
86 events, navigation and theory of mind, mental processes that require *scene construction*  
87 (Hassabis et al., 2007; Hassabis and Maguire, 2007; Spreng et al. 2009). *Scene Construction*  
88 *Theory* (Mullally and Maguire, 2013; Clark, et al., 2020) views the retrieval of episodic memories  
89 as a re-constructive process common to several other cognitive functions. According to this  
90 theory, we expect that training autobiographical memory retrieval would lead to changes in the  
91 activity and connectivity of DMN structures.

92 A different theory for autobiographical memory recall (and more broadly for episodic  
93 memory) is that of *embodied memory*, where recalls rely on sensorimotor simulations of events  
94 (Iani 2019). This theory proposes that the patterns of brain activity required during memory  
95 encoding will be reactivated at memory recall (Nyberg, et al., 2001; Nyberg, 2002; Iani, 2019).  
96 This theory is supported by imaging studies that find activation of sensory and motor areas during  
97 episodic memory recall (Nilsson, et al., 2000; Nyberg, et al., 2001; Masumoto, et al., 2006; Mineo,  
98 et al., 2018). Based on this theory, we predict that autobiographical training changes activity  
99 patterns and/or connectivity within sensorimotor networks.

100 In addition to changes in neural activity, improvements in memory could also associate  
101 with biochemical changes. Autobiographical recalls have been shown to decrease the levels of  
102 tumor necrosis factor alpha (TNF $\alpha$ ), of interleukin-2 and of interferon gamma (Matsunaga, et al.,  
103 2011; Matsunaga, et al., 2013). The relationship between inflammatory state and neural network

104 activity and connectivity is complex. At baseline, blood levels of cytokines associate with changes  
105 in the activity of the DMN, limbic, ventral attention and corticostriatal networks, and with changes  
106 in connectivity within the DMN (Kraynak, et al., 2018; Marsland, et al., 2017). In relation to  
107 autobiographical recall, whereas for interferon gamma an anti-correlation was found with  
108 activation of the orbitofrontal and posterior cingulate cortex (Matsunaga, et al., 2013), for  $TNF\alpha$  it  
109 remains to be determined if such a functional association exists. Increased levels of  
110  $TNF\alpha$  associate with poor cognitive performance and aggravated Alzheimer's dementia  
111 (Hennessy, et al., 2017). It is therefore important to determine if autobiographical training could  
112 be beneficial by decreasing cytokine levels.

113 Our hypothesis is that autobiographical memory training increases efficiency within brain  
114 networks involved in memory retrieval. To test this hypothesis, we used olfactory cues to induce  
115 recall of autobiographical memories. The choice of olfactory modality was dictated by unpublished  
116 data from our lab and also by previous findings describing the efficiency of odor-evoked memories  
117 (Matsunaga, et al., 2013; Larsson, et al., 2014; Herz, 2016). Odor-evoked autobiographical recall  
118 is a technique used in theater training for student actors, to gain access to personal memories,  
119 an exercise inspired by the view on acting and memory of Method acting (Stanislavsky, 2010;  
120 Cohen, 2010). To investigate changes in brain activity following autobiographical training that  
121 could explain lasting changes in memory performance, we performed resting-state functional MRI  
122 scanning at the beginning and at the end of training. We focused on the connectivity within  
123 functional networks. To determine if autobiographical training can also change the levels of  
124  $TNF\alpha$ , we collected blood samples at the beginning and end of training. We then tested a possible  
125 association between cytokine and brain activity dynamics.

126 Our findings bring important scientific evidence to the translational use of a technique  
127 primarily employed in theatrical training. We argue that training of autobiographical memories  
128 could be used in therapy for the prevention and treatment of memory loss.

129

130

## 131 **Methods**

132 All methods and experiments have been approved by The Ethics Committee of National  
133 University for Theatre and Film I.L. Caragiale Bucharest, and followed the guidelines of the  
134 Declaration of Helsinki. All participants provided written informed consent for their participation.  
135 **Subjects:** An experimental group of 29 subjects (25 women and 4 men) with a mean age of 34.6  
136 years and a control group of 30 subjects (24 women and 6 men) with a mean age of 32.5 years.  
137 **Exclusion criteria:** rhinitis (or other medical problems that lead to impaired smell), depression,

138 anxiety, chronic diseases that cause infection / inflammation, eyeglasses, metal implants, cardiac  
139 pacemaker, claustrophobia.

140

141 Materials: 15 odors were used: coffee, vinegar, vanilla, cocoa, wine, onion, fresh apples,  
142 cinnamon, orange, sanitary alcohol, paint, tobacco, diesel oil, jasmine fragrance and chamomile.  
143 The odors were selected and adapted from the stimuli used in previous studies (Chu and Downes,  
144 2002; Gardner, et al., 2012). The odors were presented individually from small containers with  
145 perforated lid. Two questionnaires measuring retrieved memories quality and changes in  
146 subjective memory recall process were translated and used (Addis, et al. 2004). A first  
147 questionnaire containing 3 seven point Likert scales measured retrieved memories' quality. The  
148 first scale asks them about the valence of that specific memory (where 1 is "very unpleasant" and  
149 7 is "very pleasant"), the second one asks them about the vividness of that memory (where 1 is  
150 "very faded" and 7 is "very vivid") and the third one about the personal relevance of that memory  
151 (where 1 is "totally unimportant" and 7 is "very relevant"). A second questionnaire containing 3  
152 seven point Likert scales was used for measuring subjective effect upon memory after one month  
153 of training. One scale asks to what extent did the subject noticed the onset of spontaneous  
154 memories during the day (outside of the experiment) (where 1 means "none" and 7 "to a very large  
155 extent"). The second scale asks if the subject noticed a greater ease of voluntarily accessing  
156 memories, (where 1 means "none" and 7 means "very easy"). The third scale asks to what extent  
157 the subject noticed changes in the ease of remembering her/his dreams (where 1 means "nothing"  
158 and 7 means "to a very large extent").

159

160 Procedure:

161 1. Subject inclusion criteria. A hemoleucogram and C-reactive protein (CRP) measurement were  
162 used to check for the presence of an infection / inflammation. Only subjects without signs of  
163 infection or inflammation were included. From the same blood samples collected from them, the  
164 TNF- $\alpha$  levels from lymphocytes has been measured with a high sensitivity ELISA kit.

165 2. Pre-training session. All the subjects have been exposed to an odor-triggered retrieval session  
166 and the subjects have been video monitored during the procedure. After each retrieved memory,  
167 a questionnaire has been completed regarding the quality of that memory according to the criteria  
168 of valence, vividness and personal relevance. The procedure took 30 minutes. After this session,  
169 all the subjects have been scanned using resting-state functional connectivity fMRI procedure.

170 3. Training session. After the Pre-training session, each subject from the experimental group  
171 underwent an autobiographical reminder training for one hour, 2 times / week, for 4 weeks. The

172 experimental group was stimulated to voluntary recall autobiographic memories using 15 odors.  
173 Subjects were encouraged to detail the memories as much as possible. After each reminder, a  
174 questionnaire was completed aiming at the quality of the reminder according to the criteria of  
175 valence, vividness and personal relevance. After the Pre-training session, each subject from the  
176 control group watched 2 short movies for 45 minutes, 2 times / week, for 4 weeks. After watching  
177 each movie, the subjects evaluated that movie in terms of valence, intensity and dominance.  
178 4. Post-training session. After 4 weeks, all subjects have been exposed to the following  
179 assessments: A hemoleukogram and C-reactive protein (CRP) measurement in order to check  
180 for the presence of an infection / inflammation, and also for the serum level of TNF- $\alpha$ . All subjects  
181 have been exposed to an odor-evoked autobiographical memory recall session, and during this  
182 session they have been video monitored. After each retrieved memory, a questionnaire will be  
183 completed aiming at the quality of the reminder according to the criteria of valence, vividness and  
184 personal relevance. In addition they completed 3 Likert scales regarding the changes they  
185 observed after one month of training (ease of voluntarily accessing memories, the onset of  
186 spontaneous memories during the day, and the ease of remembering her/his dreams). The  
187 procedure took 30 minutes. After this session, all subjects have been scanned using resting-state  
188 functional MRI procedure.

189 We compared the number of odor-evoked memories between Pre-training and Post-  
190 training sessions, the scores of valence, vividness and personal relevance between Pre-training  
191 and Post-training sessions, the scores of Post-training Voluntary memory scale, the level of TNF-  
192  $\alpha$  between Pre-training and Post-training sessions, and changes in brain networks connectivity,  
193 in both experimental and control groups.

194

195 Imaging: A 3T Siemens Skyra-MR scanner was used to acquire a resting state functional  
196 acquisitions with 281 axial volumes, by means of a 2-dimensional multi-slice echo-planar imaging  
197 sequence (TR=2500 ms, TE=30ms, matrix=94x94, voxel size=4x4x4.3mm). Each functional  
198 acquisition duration was 11min42s. Additionally, anatomical images were acquired (T1-weighted  
199 MP-RAGE, TR/TE=2200/2.51 ms, voxel size 0.9x0.9x0.9 mm). A high-pass temporal filtering cut-  
200 off of 100s was applied. The first 5 volumes, acquired to allow longitudinal magnetization to reach  
201 a steady state, were discarded.

202 Data analysis was performed using FMRIB Software Library (FSL) package  
203 (<http://fsl.fmrib.ox.ac.uk/fsl/fslwiki/>). Head motion in the fMRI data was corrected using multi-  
204 resolution rigid body co-registration of volumes, as implemented in the MCFLIRT software. For  
205 one experimental and one control subjects, the movement was too substantial to be corrected,

206 and data from these subjects was excluded from the rest of the analysis. Brain image extraction  
207 was carried out for motion corrected BOLD volumes with optimization of the deforming smooth  
208 surface model, as implemented in the BET software. Rigid body registration as implemented in  
209 the FLIRT software was used to co-register fMRI volumes to T1-MPRAGE (brain-extracted)  
210 volumes of the corresponding subjects and subsequently, to the MNI152 standard space. The  
211 images were smoothed with a 5 mm filter.

212

213 Resting state acquisition: Independent Component Analysis (ICA) - the Multivariate Exploratory  
214 Linear Decomposition into Independent Components (MELODIC) tool was used to perform spatial  
215 group-ICA using multisession temporal concatenation to produce 50 independent component  
216 maps (IC maps) representing average resting state networks.

217 Resting-state networks were identified by visual inspection. The IC maps associated with  
218 motion or which were localized primarily in the white matter or CSF spaces were classified using  
219 criteria suggested by Kelly et al. (2010) and excluded from further study. We also took into account  
220 ICA prominent low-frequency power of Fast Fourier Transformation (FFT) spectra and slow  
221 fluctuation in time courses. The remaining 15 networks were identified as classical RSNs as  
222 previously reported (Smith et al., 2009; Zuo et al., 2010). The Juelich histological atlas and  
223 Harvard-Oxford cortical and subcortical atlases (Harvard Center of Morphometric Analysis) were  
224 used to identify the anatomical location, and NeuroSynth 100 top terms atlas  
225 (<http://neurosynth.org>) was used to identify the functional components of the resulting ICA maps.

226 An intra-network connectivity analysis was performed. This analysis involves comparing  
227 the subject-specific spatial maps between experimental and control conditions. To determine  
228 subject-specific spatial maps, dual regression analysis was performed on the obtained neural  
229 networks using variance normalization (with variance normalization the dual regression reflects  
230 differences in both activity and spatial spread of the resting-state networks), similar to previous  
231 studies (Emerson et al., 2016; Onu et al., 2015). For the statistical analysis, i.e. the paired two-  
232 group difference (two-sample paired t-test), the different component maps were collected across  
233 subjects into single 4D files (1 per original ICA map) and tested voxel-wise by nonparametric  
234 permutation using the FSL randomize tool (<https://fsl.fmrib.ox.ac.uk/fsl/fslwiki/Randomise>) with  
235 5000 permutations and a threshold-free cluster enhanced (TFCE) technique to control for multiple  
236 comparisons. As we tested a multitude of resting state networks, we addressed the issue of  
237 multiple testing correction by controlling the false discovery rate (FDR) at  $p < 0.05$ .

238 As we were interested in knowing whether the connectivity values correlate with  
239 behavioral parameters as effect of the training program, we further extracted averaged numerical

240 values from the stage 2 maps of the main analysis, for each individual, for the specific clusters  
241 where connectivity changes occurred between training and control conditions. The connectivity  
242 quantified indices calculated as a result of these procedures were then analyzed in GraphPad  
243 Prism.

244  
245 **Biochemistry:** TNF $\alpha$  levels were measured from lymphocytes. Blood samples were obtained by  
246 venipuncture using EDTA-coated tubes. 2.5 ml fasting venous blood were used to obtain  
247 lymphocytes, which were separated by density gradient centrifugation (Biocoll separating  
248 solution, Biochrom GmbH). After separation, the lymphocytes were resuspended in 1ml RPMI  
249 culture media (Biochrom GmbH) and ultrasonicated. The supernatant was then aliquoted and  
250 stored at -20°C. Due to technical problems, many of the stored probes were compromised. We  
251 were able to use PRE and POST probes from 9 subjects that underwent training and from 5  
252 subjects in the control group. TNF $\alpha$  was measured in these samples using a high sensitivity  
253 ELISA kit (IBL International GmbH) with the detection limit of 0.13 pg/ml. The calculated intra-  
254 assay coefficient of variation was 8.5% and the inter-assay coefficient of variation was 9.8%.  
255 TNF $\alpha$  concentrations were measured using the Tecan Reader, with Magellan Reader software  
256 (Tecan Group, Ltd, Switzerland). For the calculation of results we used a 4-parameter curve.

257

258

## 259 **Results**

260

261 To determine how training might improve autobiographical memories, we evaluated several  
262 aspects related to autobiographical recollections in 29 subjects that underwent 4 weeks of training  
263 and in 30 control subjects. The autobiographical memories were triggered with olfactory cues  
264 (orange, coffee, etc.) that were presented to experimental subjects in small vials, each at a time.  
265 At baseline (Experimental Day 1, PRE) and at the end of the experiment (Experimental Day 10,  
266 POST), subjects were presented the cues and asked to recollect an episode from their own life  
267 (**Fig. 1A**). In POST, they were asked to score on an analog scale if they observed a change since  
268 the start of the experiment in several mnemonic aspects outside of laboratory settings: voluntary  
269 recollections, spontaneous recollections or dreams. During the eight days of training, the  
270 experimental subjects came to the lab and underwent a similar procedure, where they were asked  
271 to recollect autobiographical memories in response to the olfactory cues presented. Control  
272 subjects visited the lab the same amount of time, but instead of autobiographical training, they  
273 were asked to watch and score a series of videoclips, a control activity meant to match the level



274 of engagement of the experimental group. PRE and POST intervention, both experimental and  
275 control subjects were scanned at resting-state for 11.7 min in order to investigate changes in  
276 neural network activity induced by training (**Fig. 1A**).

277 At the behavioral level, we observed that autobiographical training increases the number  
278 of odor evoked recalls (**Fig. 1B**; training PRE:  $9.4 \pm 0.6$  recalls/session, training POST:  $11.5 \pm 0.4$ ,  
279  $p=0.0006$ , Wilcoxon's matched-pairs signed rank test,  $N=29$ ). The control intervention did not  
280 change the number of cue-triggered recalls (**Fig. 1B**; control PRE:  $10 \pm 0.4$  recalls/session, control  
281 POST:  $10 \pm 0.6$ ,  $p=0.7$ ,  $N=30$ ). Autobiographical training also improves the ability to recall voluntary  
282 memories outside of the laboratory setting. In the control group, only 33.4% of subjects reported  
283 an improvement of voluntary memory (score above 4, on a scale from 1 to 7), whereas in the  
284 training group 72.4% subjects reported improved voluntary recollection (**Fig. 1C**;  $p=0.02$ ,  
285 Kolmogorov-Smirnov test). The score for spontaneous memories was not affected by training  
286 (training: 44.8% subjects reported improved spontaneous memories, control: 50%,  $p=0.7$ ).  
287 Similarly, we did not observe a change in dreams following training ( $p=0.9$ , data not shown). Also,  
288 training did not change the vividness, valance and personal relevance of autobiographical recalls.  
289

### 290 **Autobiographical training increases default mode network connectivity**

291 To investigate whether changes in brain connectivity associate with changes in memory observed  
292 after autobiographical training, we acquired resting-state BOLD activity in PRE and POST in all  
293 experimental and control subjects. We considered 15 networks, and determined whether training  
294 but not control condition change connectivity for either of these networks in POST. We found an  
295 increase in the connectivity between the anterior part of the DMN and a region in the right medio-  
296 dorsal thalamus (**Fig. 2A,B**; 'PRE control' connectivity:  $-0.07 \pm 0.2$ , 'PRE training' connectivity:  
297  $0.19 \pm 0.14$ , 'POST control' connectivity:  $-0.44 \pm 0.2$ , 'POST training' connectivity:  $0.55 \pm 0.16$ ; two-  
298 way ANOVA, effect of training  $p=0.002$ , interaction between time and training  $p=0.02$ ; Sidak's  
299 multiple comparison correction shows significant difference in POST between training and control,  
300  $p=0.0003$ ). The strength of DMN-thalamus connectivity positively correlates with the number of  
301 recalls during the corresponding autobiographical session (**Fig. 2C**;  $r:0.3$ ,  $p<0.001$ ), indicating  
302 that it could serve as a mechanism for improved odor-evoked autobiographical memory retrieval.  
303 The change in DMN-thalamus connectivity did not correlate with the increase in voluntary memory  
304 after training.

305

306

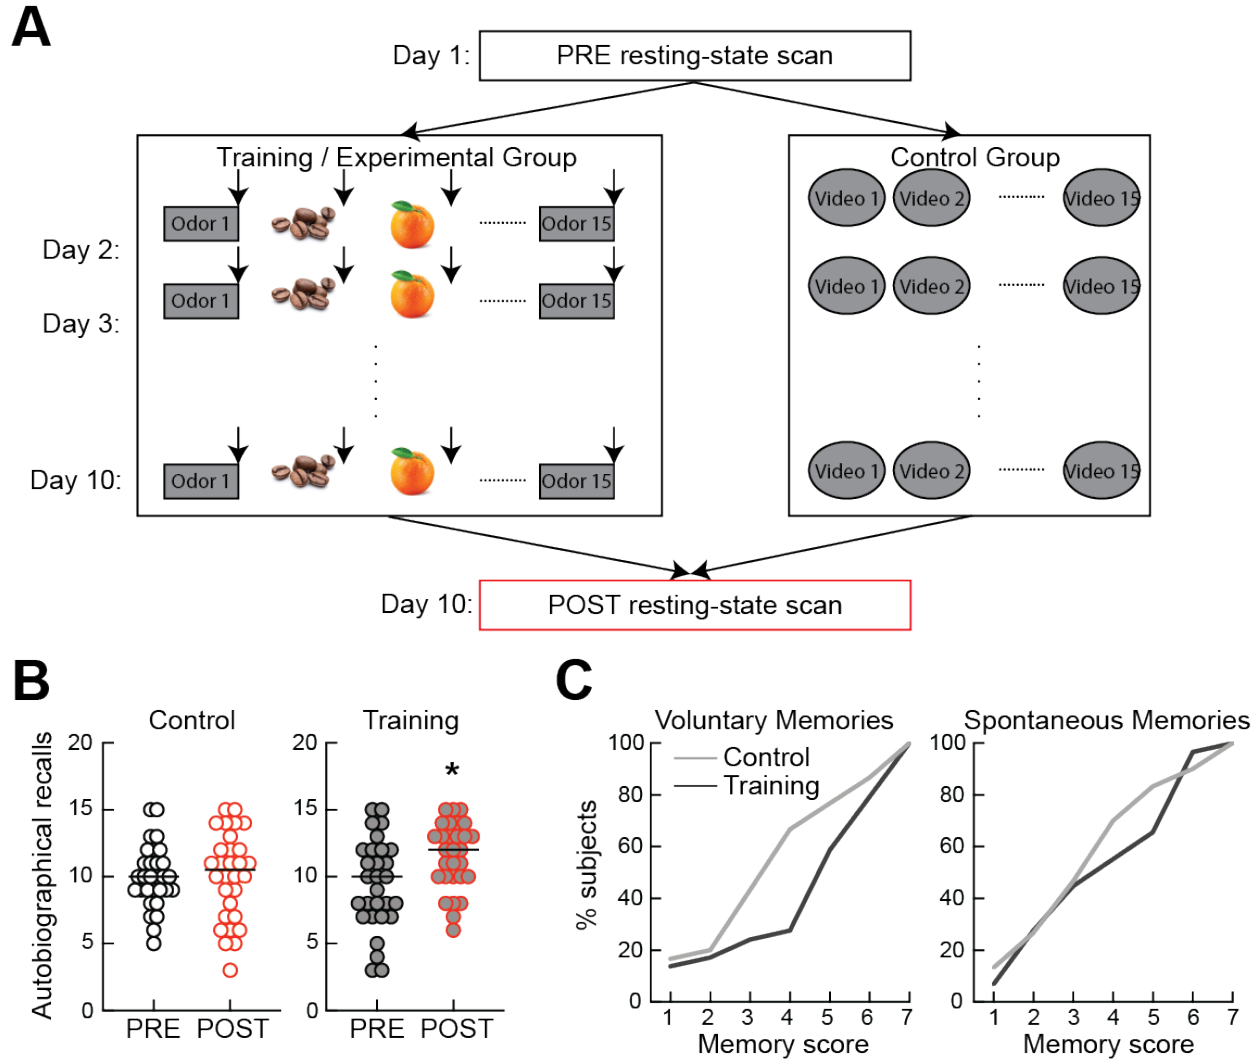

307

**Figure 1:** Behavioral effects of autobiographical training. (A) Diagram of the experimental design. (B) Training increases the number of odor-evoked recalls ( $p=0.0006$ ,  $N=29$ ). (C) Training improves voluntary recalls in a significant proportion of subjects ( $p=0.02$ ,  $N=29$ ). \*,  $p<0.05$ .

308

309

**A**

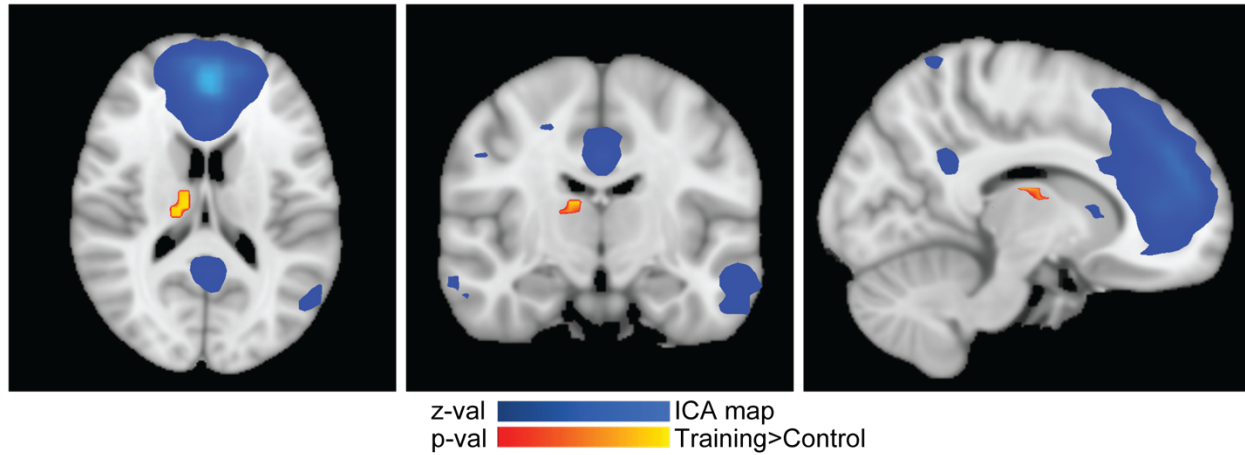

**B**

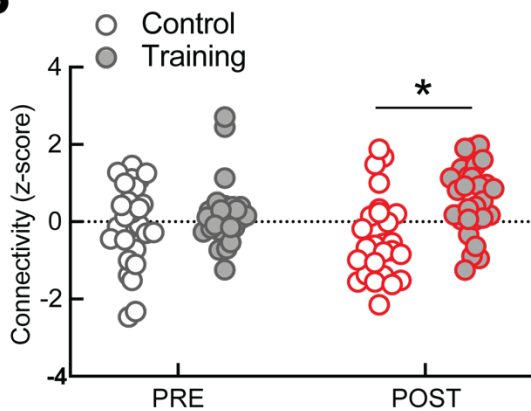

**C**

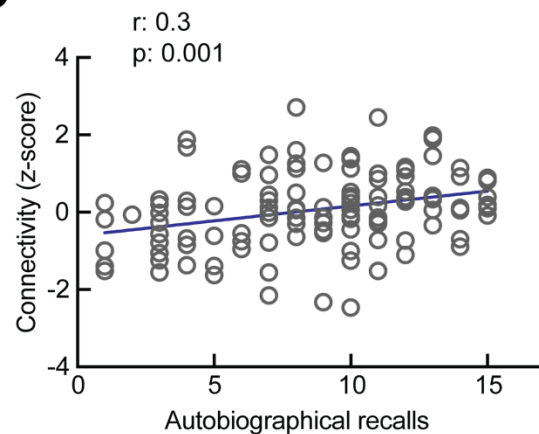

310

**Figure 2:** Increased resting state connectivity of anterior DMN after autobiographical training. (A) Horizontal, coronal and sagittal sections showing the part of right mediodorsal thalamus (yellow/red) with increased connectivity with anterior DMN (blue) after training. (B) Summary data showing increased connectivity between right thalamus and anterior DMN after training compared to controls ( $p=0.0003$ ). (C) Positive correlation between resting-state connectivity and number of odor-evoked recalls. \*,  $p<0.05$ .

311

### 312 **Autobiographical training decreases connectivity in the sensorimotor network**

313 To understand what patterns of connectivity might explain the increase in voluntary recall after  
314 training, we performed voxel-wise correlations with behavioral scores, for all subjects, in POST-  
315 training condition. Connectivity within the sensorimotor network was the only one significantly  
316 correlated with voluntary memory score after correction for multiple tests. More exactly,  
317 connectivity of clusters within the Justapositional Lobule Cortex (formerly Supplementary Motor  
318 Cortex) were negatively correlated with voluntary memory score (**Fig. 3A**). We extracted these

319 clusters and went back to subjects-specific connectivity maps (for PRE and POST conditions)  
320 and further calculate mean z-scores for these. Intra-network connectivity for the Justapositional  
321 Lobule Cortex, part of the sensorimotor network, decreased after the training procedure (**Fig. 3B**;  
322 'PRE training' connectivity:  $0.50 \pm 0.38$ , 'POST training' connectivity:  $-0.45 \pm 0.37$ , paired t-test,  
323  $p=0.01$ ), but not after the control intervention ('PRE control' connectivity:  $0.67 \pm 0.49$ , 'POST  
324 control' connectivity:  $0.70 \pm 0.35$ ,  $p=0.9$ ). There were also no significant differences in PRE  
325 between training and control groups.

326 In previous work, it has been shown that exercising sensorimotor behaviors leads to  
327 decreased BOLD activity, which was interpreted as a possible facilitation of neural functions, with  
328 more proficient sensorimotor skills associated with lower representation in sensory and motor  
329 structures (Kelly and Garavan, 2005). Consistent with these previous studies, we now find that  
330 exercising mental sensorimotor simulations of autobiographical memories leads to a decrease in  
331 intra-network connectivity that facilitates voluntary recall, as connectivity in the sensorimotor  
332 network negatively correlates with scores of voluntary memory for both experimental and control  
333 groups (**Fig. 3C**;  $r:0.5$ ,  $p<0.0001$ ).

334

### 335 **Immunological correlates of autobiographical training**

336 Previous studies documented the role played by certain immunological factors, primarily  $TNF\alpha$ ,  
337 in memory and other cognitive processes (Besedovsky and del Rey, 2011; Liu et al., 2017;  
338 Morimoto and Nakajima, 2019). We investigated whether such biological processes could be  
339 implicated in autobiographical training (**Fig. 4**). We found that the levels of blood  $TNF\alpha$  decrease  
340 after training (**Fig. 4B**,  $TNF\alpha$  PRE:  $355.1 \pm 60.54$  pg/ml,  $TNF\alpha$  POST:  $199.1 \pm 43.03$  pg/ml,  
341 Wilcoxon matched-pairs signed rank test,  $p=0.01$ ), but not after the control procedure ( $TNF\alpha$  PRE:  
342  $328.4 \pm 85.3$  pg/ml,  $TNF\alpha$  POST:  $238.9 \pm 54.04$  pg/ml,  $p=0.6$ ). We performed a voxel-wise  
343 correlation with  $TNF\alpha$  values, for subjects in POST-training condition. The  $TNF\alpha$  values positively  
344 correlated with connectivity for clusters located in left motor area (**Fig. 4A**). We extracted these  
345 clusters and went back to subjects-specific connectivity maps to collect connectivity z-scores for  
346 both experimental and control groups in PRE and POST conditions. The level of circulating  
347  $TNF\alpha$  was positively correlated with this subject specific connectivity in the sensorimotor network  
348 (**Fig. 4C**;  $r:0.5$ ,  $p=0.002$ ). These findings could indicate a potential relationship between the  
349 decrease in blood  $TNF\alpha$  and the neural correlates for improved voluntary recall following  
350 autobiographical training.

351

**A**

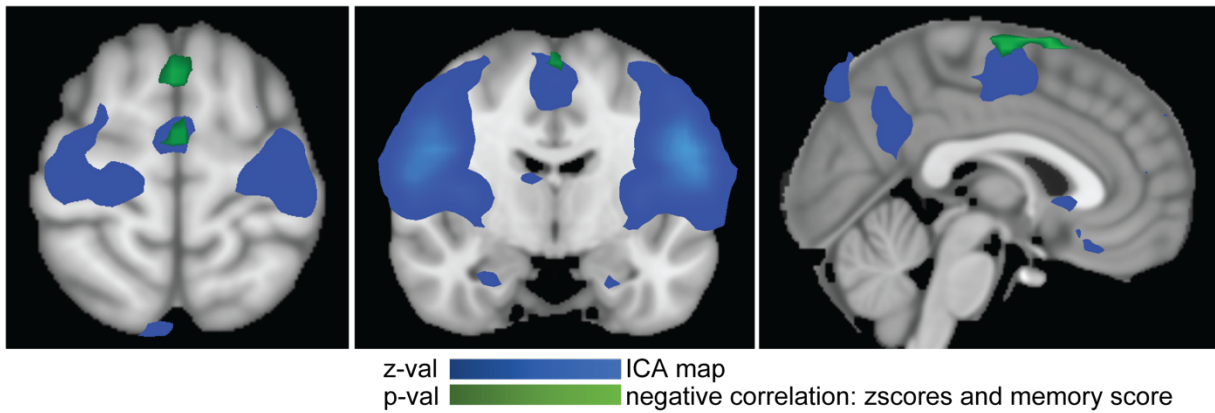

**B**

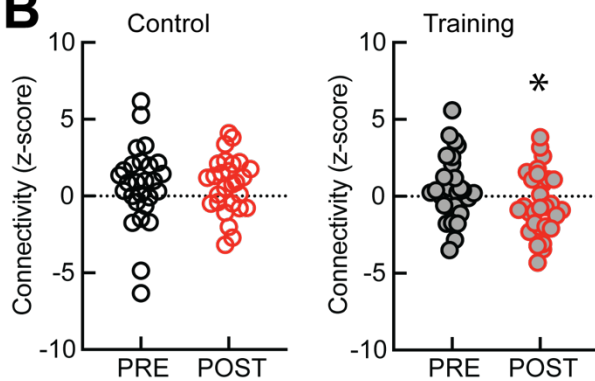

**C**

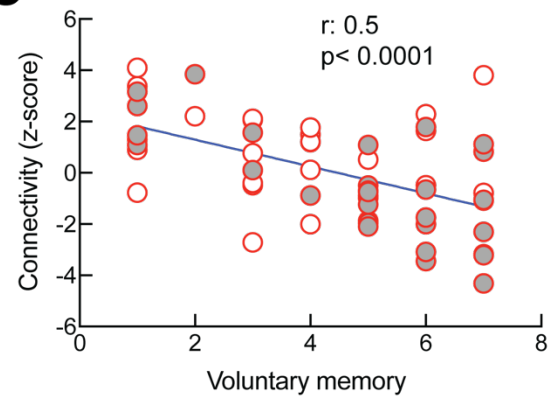

**Figure 3:** Sensorimotor network connectivity and improved voluntary memory after training. **A.** Clusters (green) within the sensorimotor network (blue) that negatively correlate with voluntary memory score. **B.** Subject specific z-score connectivity within the sensorimotor network in the training group ( $p=0.01$ ) and the control group ( $p=0.9$ ). **C.** Invers (negative) correlation between sensorimotor connectivity and voluntary memory scores across both training and control groups. Gray filled symbols represent experimental subjects. \*,  $p<0.05$ .

**A**

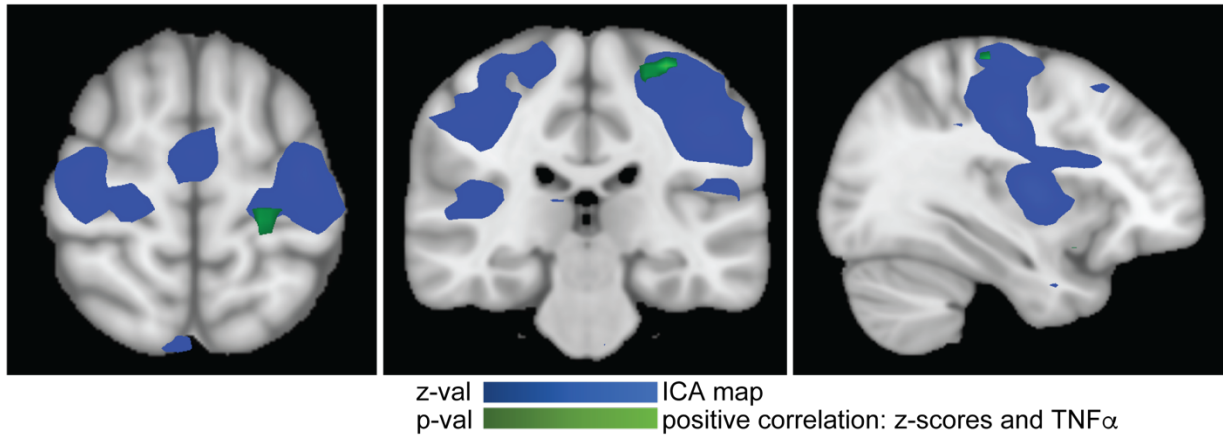

**B**

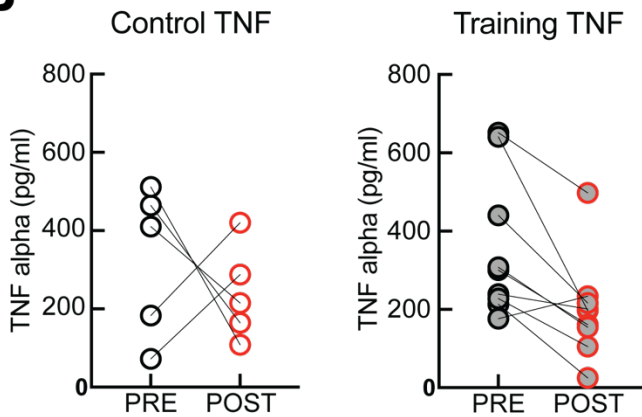

**C**

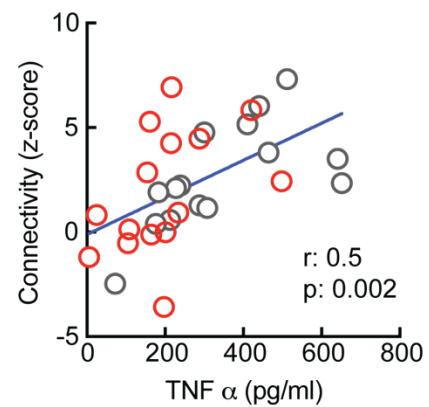

353

354

**Figure 4:** Correlation between TNF $\alpha$  and connectivity in the sensorimotor network. (A) Horizontal, coronal and sagittal sections showing the part of motor cortex (green) for which the connectivity with the rest of the sensorimotor network (blue) correlates with TNF $\alpha$  levels. (B) Summary data showing decreased TNF $\alpha$  levels after training ( $p=0.01$ ) but not after control intervention ( $p=0.6$ ). (C) Positive correlation between resting-state connectivity in the sensorimotor network and TNF $\alpha$  levels. Red symbols, training; gray symbols, control. \*,  $p<0.05$ .

355

356

357

358

359

360

## 361 **Discussion**

362 In this study we set out to determine if autobiographical training can improve mnemonic functions  
363 by changing connectivity in functional neural networks. We found that autobiographical memory  
364 training increased the number of odor-evoked retrieved memories. This confirmed previous  
365 studies in older subjects, showing that retrieval practice enhanced successful recall of personal  
366 events (Xu et al., 2020). We also found that autobiographical memory training increased the ease  
367 of voluntarily accessing memories outside the lab., consistent with previous clinical studies in  
368 schizophrenic patients (Ricarte et al., 2012).

369 A priori, we expected to find changes in the DMN network that would support the *scene*  
370 *construction* theory of memory, and in the sensorimotor network that would support the *embodied*  
371 *cognition* theory of memory. We found that autobiographical training leads to changes in the  
372 connectivity of both of these networks, which argues that both mnemonic theories have  
373 physiological relevance. None of the other thirteen functional networks considered showed  
374 significant changes with training.

375 In our study, autobiographical training increases connectivity between thalamus and DMN,  
376 and decreases connectivity within the sensorimotor network. Both of these changes could  
377 increase recall efficiency. Other studies using different training procedures found similar changes  
378 in DMN connectivity. Experienced mindfulness meditators (with more than 1000 hours of training)  
379 compared to beginner meditators (1 week of training) had increased connectivity between anterior  
380 DMN regions (dorso-medial PFC) and posterior DMN regions (inferior parietal lobule), supporting  
381 the hypothesis that meditation training leads to functional connectivity changes between these  
382 two DMN hubs (Taylor, et al., 2013). An extensive study reviewing imagistic data on practice-  
383 related brain changes found that, as performance improves, a “process switch” allows for more  
384 efficient processing: as connectivity in specific brain circuits reorganizes metabolically costly brain  
385 activity decreases (Kelly and Garavan; 2004). This phenomenon is reminiscent of the synaptic  
386 plasticity of neural circuits described in animal models (Carcea and Froemke, 2013). The  
387 increased connectivity between right mediodorsal thalamus and the anterior DMN network found  
388 in our study could indicate that training enhances thalamic engagement in the recall process. In  
389 animal models, the mediodorsal thalamus has been identified as an important component of  
390 memory systems (Hsiao et al., 2020), and its main role could be to amplify and sustain  
391 representations in prefrontal structures (Schmitt et al., 2017; Parnaudeau et al., 2018). It is also  
392 possible that the increased connectivity that we detect after training reflects a stronger filtering  
393 input from prefrontal structures onto the thalamus (Nakajima et al., 2019), a process that would  
394 limit the interference of external sensory stimuli on the autobiographic recall.

395           The training-induced decrease in connectivity that we observe within the sensorimotor  
396 network is consistent with the ‘neural efficiency’ hypothesis that posits that training a response  
397 reduces activity in sensorimotor areas (Guo et al., 2017). In addition to decreases in activity,  
398 previous reports also found decreased connectivity following various types of training (McGregor  
399 and Gribble, 2017; Yue et al., 2020). However, to the best of our knowledge we are first to report  
400 decreased sensorimotor connectivity following autobiographical training. The inverse correlation  
401 between sensorimotor connectivity and voluntary memory improvement post-training, supports  
402 the notion that this change represents a mechanism for ‘neural efficiency’.

403           The decrease in circulating immune factor  $TNF\alpha$  indicates that autobiographical training  
404 might exert effects on bodily tissues as well. Immune response can be adjusted by the activity of  
405 the sympathetic nervous system and by hormonal activity especially linked to the adrenal gland  
406 (Segerstrom and Miller, 2004; Nance and Sanders, 2007; Kenney and Ganta, 2014). Two broad  
407 networks in the cerebral cortex that have access to adrenal gland (Dum, et al., 2016). The larger  
408 network they found includes all of the cortical motor areas in the frontal lobe and portions of  
409 somatosensory cortex, indicating that specific circuits exist to connect movement, cognition, and  
410 emotions to the function of the adrenal medulla. A systematic review of 24 functional magnetic  
411 resonance imaging studies investigated brain regions and networks associated with peripheral  
412 inflammation in humans and found a so-called “posterior putamen loop” which comprises also the  
413 sensorimotor cortex and is implicated in sensorimotor processes (Kraynak, et al., 2018). Taken  
414 together, these results indicate possible bidirectional interactions between peripheral  
415 inflammatory processes and various cognitive, affective and sensorimotor contexts.

416           A recent study suggests that mental health and physical health are linked by neural  
417 systems that regulate both somatic physiology and high-level cognition (Koban et al., 2021). The  
418 study proposes a “self-in-context” model which hypothesizes that events with personal meaning  
419 guide learning from experience and constructs narratives about the self and the environment  
420 (autobiographical memories), but at the same time can control peripheral physiology in a  
421 predictive way, including autonomic, neuroendocrine and immune functions. This model is in line  
422 with our findings and with previous research which demonstrated that cortical areas involved in  
423 the control of movement, cognition, and affect are sources of central commands to influence  
424 sympathetic arousal (Dum et al., 2016). This means that cognitive operations like action planning  
425 but also recalling significant actions from past events may be linked to the regulation of the adrenal  
426 function, and of the immune system. Finally, the Embodied Predictive Interoception Coding  
427 (EPIC) model proposed that brain did not evolve for rationality but to ensure resources for  
428 physiological systems within an animal’s body, and the psychological processes such as



429 remembering, deciding and paying attention are in service for surviving, thriving and reproducing.  
430 To succeed, the brain has to control metabolic and other biological resources and performs by  
431 regulating the autonomic nervous system, the endocrine system and immune system (Kleckner  
432 et al., 2017).

433 In the future it will be important to determine the mechanism by which autobiographical  
434 training could impact the levels of  $TNF\alpha$ . Given the correlation between  $TNF\alpha$  levels and  
435 sensorimotor connectivity, structures within the sensorimotor network could be part of the  
436 mechanism for autobiographical immune control. Limitations of this study are represented by the  
437 little success in recruiting male subjects into the study, and by the small sample of reliable  
438 immunitary data collected from the participants

439 .

440

441

442

443

444

445

446

447

448

449

450

451

452

453

454

455 **Funding**

456 The project “Developing a methodology of therapy through theatre with an effect at the  
457 neurochemical and neurocognitive levels” (MET) is co-financed by the European Regional  
458 Development Fund (ERDF) through Competitiveness Operational Programme 2014-2020, SMIS  
459 code 106688 and implemented by UNATC “I.L. Caragiale”, CINETic Centre, LDCAPEI LAB.  
460 First author was also funded by an International Brain Research Organization (IBRO) fellowship.

461 **Disclosure**

462 The authors have nothing to disclose. The authors declare that the research was conducted in the  
463 absence of any commercial or financial relationships that could be construed as a potential conflict  
464 of interest.

465 **Acknowledgements**

466 We thank Prof. Nicolae Manda, Prof. Liviu Lucaci and Prof. Radu Apostol for their  
467 administrative support, Dr. Robert C. Froemke and Dr. Justin S. Riceberg for consultation, and  
468 Doina Strat for her technical support.

469 **Author contributions**

470 All authors contributed to the design of experiments and interpretation of results. DC (first author)  
471 performed the autobiographical training with help from AS, TR, M-YT, AD, and collected  
472 behavioral and MRI data with help from DG, DT and AIB. MO collected and analyzed the MRI  
473 data. CCP analyzed the behavior data with help from IRP. NP recruited and selected subjects. DC,  
474 MO and IC wrote the manuscript, with feedback from all authors.

475

476

477

478

479

480

481

482

483 **References**

484

485 Addis, D.R., Moscovitch, M., Crawley, A.P., McAndrews, M.P., 2004. Recollective qualities  
486 modulate hippocampal activation during autobiographical memory retrieval.

487 Hippocampus. doi: [10.1002/hipo.10215](https://doi.org/10.1002/hipo.10215)

488 Besedovsky, H.O., del Rey, A., 2011. Central and peripheral cytokines mediate immune-brain  
489 connectivity. *Neurochem. Res.* doi: [10.1007/s11064-010-0252-x](https://doi.org/10.1007/s11064-010-0252-x)

490 Buchanan, T.W., 2007. Retrieval of emotional memories. *Psychol. Bull.* doi: [10.1037/0033-](https://doi.org/10.1037/0033-2909.133.5.761)  
491 [2909.133.5.761](https://doi.org/10.1037/0033-2909.133.5.761)

492 Carcea, I., Froemke, R.C., 2013. Cortical plasticity, excitatory-inhibitory balance, and sensory  
493 perception. *Prog. Brain. Res.* doi: [10.1016/B978-0-444-63327-9.00003-5](https://doi.org/10.1016/B978-0-444-63327-9.00003-5)

494 Chu, S., Downes, J.J., 2002. Proust nose best: Odors are better cues of autobiographical  
495 memory. *Mem. Cognit.* doi: [10.3758/bf03194952](https://doi.org/10.3758/bf03194952)

496 Clark, I.A., Monk, A.M., Maguire, E.A., 2020. Characterizing strategy use during the  
497 performance of hippocampal-dependent tasks. *Front. Psychol.* doi:

498 [10.3389/fpsyg.2020.02119](https://doi.org/10.3389/fpsyg.2020.02119)

499 Cohen, L., 2010. *The Lee Strasberg Notes* Routledge, p.14-20. ISBN10: 0-415-55185-4 New  
500 York

501 de Marco, M., Meneghello, F., Duzzi, D., Rigon, J., Pilosio, C., Venneri, A., 2016. Cognitive  
502 stimulation of the default-mode network modulates functional connectivity in healthy  
503 aging. *Brain. Res. Bull.* doi:[10.1016/j.brainresbull.2015.12.001](https://doi.org/10.1016/j.brainresbull.2015.12.001)

504 Dum, R.P., Levinthal, D.J., Strick, P.L., 2016. Motor, cognitive, and affective areas of the  
505 cerebral cortex influence the adrenal medulla. *Proc. Natl. Acad. Sci. U. S. A.* doi:

506 [10.1073/pnas.1605044113](https://doi.org/10.1073/pnas.1605044113)

507 Emerson, R.W., Gao, W., Lin, W., 2016. Longitudinal study of the emerging functional  
508 connectivity asymmetry of primary language regions during infancy. *J. Neurosci.* doi:

509 [10.1523/JNEUROSCI.3980-15.2016](https://doi.org/10.1523/JNEUROSCI.3980-15.2016)

510 Gardner, R.S., Vogel, A.T., Mainetti, M., Ascoli, G.A., 2012. Quantitative measurements of  
511 autobiographical memory content. *PLOS One.* doi: [10.1371/journal.pone.0044809](https://doi.org/10.1371/journal.pone.0044809)

512 Guo, Z., Li, A., Yu, L. 2017. "Neural efficiency" of athletes' brain during visuo-spatial task: an  
513 fMRI study on table tennis players. *Front. Behav. Neurosci.* doi:

514 [10.3389/fnbeh.2017.00072](https://doi.org/10.3389/fnbeh.2017.00072)

515 Hassabis, D., Maguire, E.A., 2007. Deconstructing episodic memory with construction. *Trends*  
516 *Cogn. Sci.* doi:[10.1016/j.tics.2007.05.001](https://doi.org/10.1016/j.tics.2007.05.001)

- 517 Hassabis, D., Kumaran, D., Maguire, E.A., 2007. Using imagination to understand the neural basis  
518 of episodic memory. *J. Neurosci.* doi: [10.1523/JNEUROSCI.4549-07.2007](https://doi.org/10.1523/JNEUROSCI.4549-07.2007)
- 519 Hennessy, E., Gormley, S., Lopez-Rodriguez, A.B., Murray, C., Cunningham, C., 2017.  
520 Systemic TNF- $\alpha$  produces acute cognitive dysfunction and exaggerated sickness  
521 behavior when superimposed upon progressive neurodegeneration. *Brain. Behav. Immun.*  
522 doi: [10.1016/j.bbi.2016.09.011](https://doi.org/10.1016/j.bbi.2016.09.011)
- 523 Herz, R.S., 2016. The role of odor-evoked memory in psychological and physiological health.  
524 *Brain Sci.* doi: [10.3390/brainsci6030022](https://doi.org/10.3390/brainsci6030022)
- 525 Hitchcock, C., Werner-Seidler, A., Blackwell, S.E., Dalgleish, T., 2017. Autobiographical  
526 episodic memory-based training for the treatment of mood, anxiety and stress-related  
527 disorders: A systematic review and meta-analysis. *Clin. Psychol. Rev.* doi:  
528 [10.1016/j.cpr.2016.12.003](https://doi.org/10.1016/j.cpr.2016.12.003)
- 529 Hsiao, K., Noble, C., Pitman, W., Yadav, N., Kumar, S., Keel, G.R., Terceros, A., Kanke, M.,  
530 Conniff, T., Cheleuitte-Nieves, C., Tolwani, R., Sethupathy, P., Rajasethupathy, P.,  
531 2020. A thalamic orphan receptor drives variability in short-term memory. *Cell.* doi:  
532 [10.1016/j.cell.2020.09.011](https://doi.org/10.1016/j.cell.2020.09.011)
- 533 Iani, F., 2019. Embodied memories: Reviewing the role of the body in memory processes.  
534 *Psycon. Bull. Rev.* doi: [10.3758/s13423-019-01674-x](https://doi.org/10.3758/s13423-019-01674-x)
- 535 Kelly, A.M.C., Garavan, H., 2005. Human functional neuroimaging of brain changes associated  
536 with practice. *Cereb. Cortex.* doi: [10.1093/cercor/bhi005](https://doi.org/10.1093/cercor/bhi005)
- 537 Kelly Jr, R.E., Alexopoulos, G.S., Wang, Z., Gunning, F.M., Murphy, C.F., Morimoto, S.S.,  
538 Kanellopoulos, D., Jia, Z., Lim, K.O., Hoptman, M.J., 2010. Visual inspection of  
539 independent components: Defining a procedure for artifact removal from fMRI data. *J.*  
540 *Neurosci. Methods.* doi: [10.1016/j.jneumeth.2010.03.028](https://doi.org/10.1016/j.jneumeth.2010.03.028)
- 541 Kenney, M.J., Ganta, C.K., 2014. Autonomic nervous system and immune system interactions.  
542 *Compr. Physiol.* doi: [10.1002/cphy.c130051](https://doi.org/10.1002/cphy.c130051)
- 543 Kleckner, I.R., Zhang, J., Touroutoglou, A., Chanes, L., Xia, C., Simmons, W.K., Quigley, K.S.,  
544 Dickerson, B.C., Barrett, L.F., 2017. Evidence for a large-scale brain system supporting  
545 allostasis and interoception in humans. *Nat. Hum. Behav.* doi: [10.1038/s41562-017-](https://doi.org/10.1038/s41562-017-0069-0069)  
546 [0069](https://doi.org/10.1038/s41562-017-0069-0069)
- 547 Koban, L., Gianaros, P.J., Kober, H., Wager, T.D., 2021. The self in context: brain systems  
548 linking mental and physical health. *Nat. Rev. Neurosci.* doi: [10.1038/s41583-021-00446-](https://doi.org/10.1038/s41583-021-00446-8)  
549 [8](https://doi.org/10.1038/s41583-021-00446-8)

- 550 Kohler, C.A., Carvalho, A.F., Alves, G.S., McIntyre, R.S., Hyphantis, T.N., Cammarota, M.,  
551 2015. Autobiographical memory disturbances in depression: A novel therapeutic target?  
552 *Neural Plast.* doi :[10.1155/2015/759139](https://doi.org/10.1155/2015/759139)
- 553 Kraynak, T.E., Marsland, A.L., Wager, T.D., Gianaros, P.J., 2018. Functional neuroanatomy of  
554 peripheral inflammatory physiology: A meta-analysis of human neuroimaging studies.  
555 *Neurosci. Biobehav. Rev.* doi: [10.1016/j.neubiorev.2018.07.013](https://doi.org/10.1016/j.neubiorev.2018.07.013)
- 556 Larsson, M., Willander, J., Karlsson, K., Arshamian, A., 2014. Olfactory LOVER: behavioral and  
557 neural correlates of autobiographical odor memory. *Front. Psychol.*  
558 doi:[10.3389/fpsyg.2014.00312](https://doi.org/10.3389/fpsyg.2014.00312)
- 559 Liu, W., Zhou, L-J., Wang, J., Li, D., Ren, W-J, Peng, J., Wei, X., Xu, T., Xin, W-J., Pang, R-P.,  
560 Li, Y-Y., Qin, Z-H., Murugan, M., Mattson, M.P., Wu, L-J., Liu, X-G., 2017. TNF- $\alpha$   
561 differentially regulates synaptic plasticity in the hippocampus and spinal cord by  
562 microglia-dependent mechanisms after peripheral nerve injury. *J. Neurosci.*  
563 doi: [10.1523/JNEUROSCI.2235-16.2016](https://doi.org/10.1523/JNEUROSCI.2235-16.2016)
- 564 Marsland, A.L., Kuan, D. C-H., Sheu, L.K., Krajina, K., Kraynak, K.E., Manuck, S.B., Gianaros,  
565 P.J., 2017. Systemic inflammation and resting state connectivity of the default mode  
566 network. *Brain. Behav. Immun.* doi: [10.1016/j.bbi.2017.01.013](https://doi.org/10.1016/j.bbi.2017.01.013)
- 567 Masumoto, K., Yamaguchi, M., Sutani, K., Tsuneto, S., Fujita, A., Tonoike, M., 2006.  
568 Reactivation of physical motor information in the memory of action events. *Brain Res.*  
569 doi: [10.1016/j.brainres.2006.05.033](https://doi.org/10.1016/j.brainres.2006.05.033)
- 570 Matsunaga, M., Bai, Y., Yamakawa, K., Toyama, A., Kashiwagi, M., Fukuda, K., Yamada, J.,  
571 2013. Brain-immune interaction accompanying odor-evoked autobiographic memory.  
572 *PLoS ONE.* doi: [10.1371/journal.pone.0072523](https://doi.org/10.1371/journal.pone.0072523)
- 573 Matsunaga, M., Isowa, T., Yamakawa, K., Kawanishi, Y., Tsuboi, H., Kaneko, H., Ohira, H.,  
574 2011. Psychological and physiological responses to odor-evoked autobiographic  
575 memory. *Neuro. Endocrinol. Lett.* PMID: [22286798](https://pubmed.ncbi.nlm.nih.gov/22286798/)
- 576 Mineo, L., Concerto, C., Patel, D., Mayorga, T., Chusid, E., Infortuna, C., Aguglia, E., Sarraf, Y.,  
577 Battaglia, F., 2018. Modulation of sensorimotor circuits during retrieval of negative  
578 autobiographical memories: Exploring the impact of personality dimensions.  
579 *Neuropsychologia.* doi: [10.1016/j.neuropsychologia.2017.04.016](https://doi.org/10.1016/j.neuropsychologia.2017.04.016)
- 580 McGregor, H.R., Gribble, P.L., 2017. Functional connectivity between somatosensory and motor  
581 brain areas predicts individual differences in motor learning by observing. *J*  
582 *Neurophysiol.* doi: [10.1152/jn.00275.2017](https://doi.org/10.1152/jn.00275.2017)

- 583 Morimoto, K., Nakajima, K., 2019. Role of the immune system in the development of the central  
584 nervous system. *Front. Neurosci.* doi: [10.3389/fnins.2019.00916](https://doi.org/10.3389/fnins.2019.00916)
- 585 Mulally, S.L., Maguire, E.A., 2013. Memory, imagination, and predicting the future: a common  
586 brain mechanism? *Neuroscientist*. doi: [10.1177/1073858413495091](https://doi.org/10.1177/1073858413495091)
- 587 Nakajima, M., Schmitt, L.I., Halassa, M.M., 2019. Prefrontal cortex regulates sensory filtering  
588 through a basal ganglia-to-thalamus pathway. *Neuron*. doi:  
589 [10.1016/j.neuron.2019.05.026](https://doi.org/10.1016/j.neuron.2019.05.026)
- 590 Nance, D.M., Sanders, V.M., 2007. Autonomic innervation and regulation of the immune  
591 system(1987-2007). *Brain Behav. Immun.* doi: [10.1016/j.bbi.2007.03.008](https://doi.org/10.1016/j.bbi.2007.03.008)
- 592 Nilsson, L. G., Nyberg, L., Klingberg, T., Åberg, C., Persson, J., Roland, P. E., 2000. Activity in  
593 motor areas while remembering action events. *Neuroreport*. doi:  
594 [10.1097/00001756200007140-00027](https://doi.org/10.1097/00001756200007140-00027)
- 595 Nyberg, L., 2002. Levels of processing: A view from functional brain imaging. *Memory*. doi:  
596 [10.1080/09658210244000171](https://doi.org/10.1080/09658210244000171)
- 597 Nyberg, L., Petersson, K. M., Nilsson, L. G., Sandblom, J., Åberg, C., Ingvar, M., 2001.  
598 Reactivation of motor brain areas during explicit memory for actions. *Neuroimage*. doi:  
599 [10.1006/nimg.2001.0801](https://doi.org/10.1006/nimg.2001.0801)
- 600 Onu, M., Badea, L., Roceanu, A., Tivarus, M., Bajenaru, O., 2015. Increased connectivity  
601 between sensorimotor and attentional areas in Parkinson's disease. *Neuroradiology*. doi:  
602 [10.1007/s00234-015-1556-y](https://doi.org/10.1007/s00234-015-1556-y)
- 603 Parnaudeau, S., Bolkan, S.S., Kellendonk, C., 2017. The mediodorsal thalamus: an essential  
604 partner of the prefrontal cortex for cognition. *Biol.Psychiatry*. doi:  
605 [10.1016/j.biopsych.2017.11.008](https://doi.org/10.1016/j.biopsych.2017.11.008)
- 606 Ricarte, J.J., Hernandez-Viadel, J.V., Latorre, J.M., Ros, L., 2012. Effects of event-specific  
607 memory training on autobiographical memory retrieval and depressive symptoms in  
608 schizophrenic patients. *J. Behav. Ther. Exp. Psychiatry*.doi: [10.1016/j.jbtep.2011.06.001](https://doi.org/10.1016/j.jbtep.2011.06.001)
- 609 Schmitt, L.I., Wimmer, R.D., Nakajima, N., Happ, M., Mofakham, S., Halassa, M.M., 2017.  
610 Thalamic amplification of cortical connectivity sustains attentional control. *Nature*. doi:  
611 [10.1038/nature22073](https://doi.org/10.1038/nature22073)
- 612 Serrano, J.P., Latorre, J.M., Gatz, M., Montanes, J., 2004. Life review therapy using  
613 autobiographical retrieval practice for older adults with depressive symptomatology.  
614 *Psychol. Aging*. doi:[10.1037/0882-7974.19.2.270](https://doi.org/10.1037/0882-7974.19.2.270)

- 615 Segerstrom, S.C., Miller, G.E., 2004. Psychological stress and the human immune system: a  
616 meta-analytic study of 30 years of inquiry. *Psychol.Bull.* doi: [10.1037/0033-](https://doi.org/10.1037/0033-2909.130.4.601)  
617 [2909.130.4.601](https://doi.org/10.1037/0033-2909.130.4.601)
- 618 Smith, S.M., Fox, P.T., Miller, K.L., Glahn, D.C., Fox, P.M., Mackay, C.E., Filippini, N., Watkins,  
619 K.E., Toro, R., Laird, A.R., Beckmann, C.F., 2009. Correspondence of the brain's  
620 functional architecture during activation and rest. *Proc. Natl. Acad. Sci. U. S. A.* doi:  
621 [10.1073/pnas.0905267106](https://doi.org/10.1073/pnas.0905267106)
- 622 Spreng, R.N., Mar, R.A., Kim, A.S.N., 2009. The common neural basis of autobiographical  
623 memory, prospection, navigation, theory of mind, and the default mode: a quantitative  
624 meta-analysis. *J. Cogn. Neurosci.* doi: [10.1162/jocn.2008.21029](https://doi.org/10.1162/jocn.2008.21029)
- 625 Stanislasky, K. S., 2010. An actor's work on a role (translated and edited by Jean Benedetti) p.  
626 97 ISBN 0-203-87092-1 Master e-book ISBN Routledge, New York
- 627 Taylor, V.A., Daneault, V., Grant, J., Scavone, G., Breton, E., Roffe-Vidal, S., Courtemanche, J.,  
628 Lavarenne, A.S., Marrelec, G., Benali, H., Beauregard, M., 2013. Impact of meditation  
629 training on the default mode network during a restful state. *Soc. Cogn. Affect. Neurosci.*  
630 doi: [10.1093/scan/nsr087](https://doi.org/10.1093/scan/nsr087)
- 631 ten Brinke, L.F., Davis, J.C., Barha, C.K., Liu-Ambrose, T., 2017. Effects of computerized  
632 cognitive training on neuroimaging outcomes in older adults: a systematic review. *BMC*  
633 *Geriatr.* doi: [10.1186/s12877-017-0529-x](https://doi.org/10.1186/s12877-017-0529-x)
- 634 Xu, Q., Zhang, J., Grandjean, J., Tan, C., Subbaraju, V., Li, L., Lee, K.J., Hsieh, P-J., Lim, J-H.,  
635 Neural correlates of retrieval-based enhancement of autobiographical memory in older  
636 adults. *Sci. Rep.* doi: [10.1038/s41598-020-58076-6](https://doi.org/10.1038/s41598-020-58076-6)
- 637 Yue, C., Zhang, Y., Jian, M., Herold, F., Yu, Q., Mueller, P., Lin, J., Wang, G., Tao, Y., Zhang,  
638 Z., Zou, L., 2020. Differential effects of tai chi chuan (motor-cognitive training) and  
639 walking on brain networks: a resting-state fmri study in chinese women aged 60.  
640 *Healthcare.* doi: [10.3390/healthcare8010067](https://doi.org/10.3390/healthcare8010067)
- 641 Zuo, X-N., Kelly, C., Adelstein, J.S., Klein, D.F., Castellanos, F.X., Milham, M.P., 2010. Reliable  
642 intrinsic connectivity networks: test-retest evaluation using ICA and dual regression  
643 approach. *Neuroimage.* doi: [10.1016/j.neuroimage.2009.10.080](https://doi.org/10.1016/j.neuroimage.2009.10.080)

644  
645  
646  
647





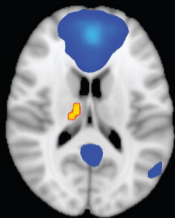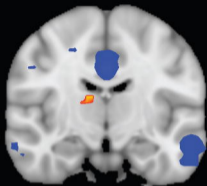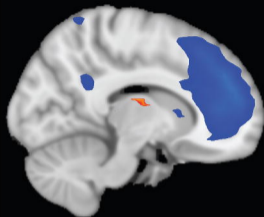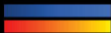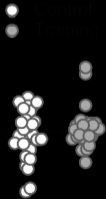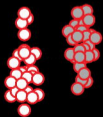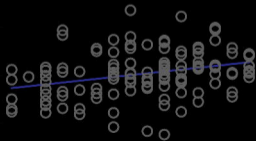

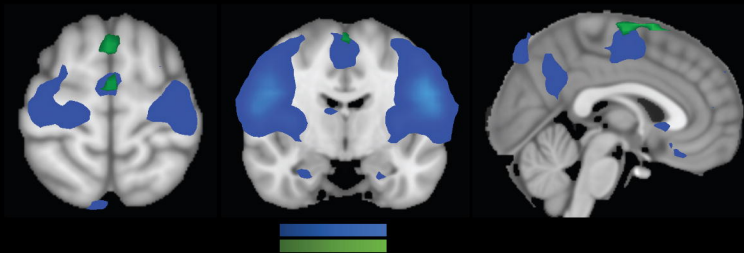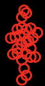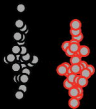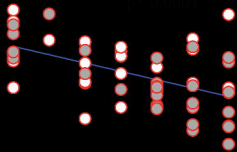

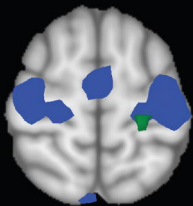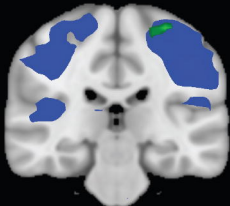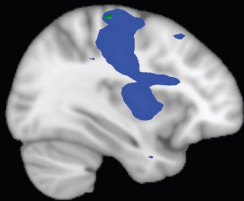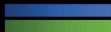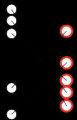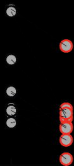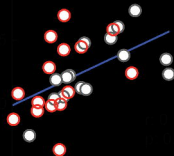

Source: http://biorxiv.org/content/10.1101/2021.10.05.463255v1.full.pdf
